# Supplementary material for: Supporting implementation of interventions to address ethnicity-related health inequities: frameworks, facilitators and barriers – a scoping review protocol
Source: PubMed Central journal article supplement — BMJ Open. 2023 Feb 9;13(2):e065721. doi: 10.1136/bmjopen-2022-065721 (PMC9923318; doi:10.1136/bmjopen-2022-065721), 2023-02-09

# BMJ Open

BMJ Open is committed to open peer review. As part of this commitment we make the peer review history of every article we publish publicly available.

When an article is published we post the peer reviewers' comments and the authors' responses online. We also post the versions of the paper that were used during peer review. These are the versions that the peer review comments apply to.

The versions of the paper that follow are the versions that were submitted during the peer review process. They are not the versions of record or the final published versions. They should not be cited or distributed as the published version of this manuscript.

BMJ Open is an open access journal and the full, final, typeset and author-corrected version of record of the manuscript is available on our site with no access controls, subscription charges or pay-per-view fees (<http://bmjopen.bmj.com>).

If you have any questions on BMJ Open's open peer review process please email [info.bmjopen@bmj.com](mailto:info.bmjopen@bmj.com)

# BMJ Open

## Supporting implementation of interventions to address ethnicity-related health inequities: frameworks, facilitators, and barriers: A scoping review protocol

|                               |                                                                                                                                                                                                                                                                                                                                                                                                                                                                                                                                                                                                                                                                                                                                                                                                                                                          |
|-------------------------------|----------------------------------------------------------------------------------------------------------------------------------------------------------------------------------------------------------------------------------------------------------------------------------------------------------------------------------------------------------------------------------------------------------------------------------------------------------------------------------------------------------------------------------------------------------------------------------------------------------------------------------------------------------------------------------------------------------------------------------------------------------------------------------------------------------------------------------------------------------|
| Journal:                      | <i>BMJ Open</i>                                                                                                                                                                                                                                                                                                                                                                                                                                                                                                                                                                                                                                                                                                                                                                                                                                          |
| Manuscript ID                 | bmjopen-2022-065721                                                                                                                                                                                                                                                                                                                                                                                                                                                                                                                                                                                                                                                                                                                                                                                                                                      |
| Article Type:                 | Protocol                                                                                                                                                                                                                                                                                                                                                                                                                                                                                                                                                                                                                                                                                                                                                                                                                                                 |
| Date Submitted by the Author: | 14-Jun-2022                                                                                                                                                                                                                                                                                                                                                                                                                                                                                                                                                                                                                                                                                                                                                                                                                                              |
| Complete List of Authors:     | Gustafson, Papillon; University of Otago Division of Health Sciences, Ngāi Tahu Māori Health Research Unit<br>Abdul Aziz, Yasmin; University of Otago Division of Health Sciences, Ngāi Tahu Māori Health Research Unit<br>Lambert, Michelle; University of Otago Division of Health Sciences, Ngāi Tahu Māori Health Research Unit<br>Bartholomew, Karen; Waitemata District Health Board; Auckland District Health Board<br>Brown, Rachel; National Hauora Coalition<br>Carswell, Peter; Synergia Ltd<br>Fusheini, Adam; University of Otago Dunedin School of Medicine, Preventive and Social Medicine<br>Ratima, Mihi; Taumata Associates<br>Priest, Patricia; University of Otago Dunedin School of Medicine, Preventive and Social Medicine<br>Crengle, Sue; University of Otago Division of Health Sciences, Ngāi Tahu Māori Health Research Unit |
| Keywords:                     | PUBLIC HEALTH, QUALITATIVE RESEARCH, Organisation of health services < HEALTH SERVICES ADMINISTRATION & MANAGEMENT, Quality in health care < HEALTH SERVICES ADMINISTRATION & MANAGEMENT                                                                                                                                                                                                                                                                                                                                                                                                                                                                                                                                                                                                                                                                 |
|                               |                                                                                                                                                                                                                                                                                                                                                                                                                                                                                                                                                                                                                                                                                                                                                                                                                                                          |

SCHOLARONE™  
Manuscripts

1  
2  
3 1 Supporting implementation of interventions to address ethnicity-related health inequities:  
4 2 frameworks, facilitators, and barriers: A scoping review protocol

5 3  
6  
7  
8 4 Corresponding author: Professor Sue Crengle, PO Box 56, Dunedin, New Zealand 9054  
9 5 [sue.crengle@otago.ac.nz](mailto:sue.crengle@otago.ac.nz)

10 6  
11 7 Authors

12 8  
13 9 Papillon Gustafson, Ngāi Tahu Māori Health Research Unit, Division of Health Sciences,  
14 10 University of Otago, Dunedin Campus, Dunedin, Aotearoa New Zealand, ORCID: 0000-0001-  
15 11 8645-8490

16 12  
17 13 Yasmin Abdul Aziz, Ngāi Tahu Māori Health Research Unit, Division of Health Sciences,  
18 14 University of Otago, Dunedin Campus, Dunedin, Aotearoa New Zealand, ORCID: 0000-0002-  
19 15 0564-664X

20 16  
21 17 Michelle Lambert, Ngāi Tahu Māori Health Research Unit, Division of Health Sciences,  
22 18 University of Otago, Dunedin Campus, Dunedin, Aotearoa New Zealand, ORCID: 0000-0002-  
23 19 0439-7557

24 20  
25 21 Karen Bartholomew, Waitematā District Health Board and Auckland District Health Board,  
26 22 Auckland, Aotearoa New Zealand, ORCID: 0000-0002-1517-2134

27 23  
28 24 Rachel Brown, National Hauora Coalition, Auckland, Aotearoa New Zealand

29 25  
30 26 Peter Carswell, Synergia Ltd, Auckland, Aotearoa New Zealand

31 27  
32 28 Adam Fusheini, Preventive and Social Medicine, University of Otago, Dunedin Campus,  
33 29 Dunedin, Aotearoa New Zealand, ORCID: 0000-0001-7896-3841

34 30  
35 31 Mihi Ratima, Taumata Associates, Hāwera, Aotearoa New Zealand

36 32  
37 33 Patricia Priest, Preventive and Social Medicine, University of Otago, Dunedin Campus,  
38 34 Dunedin, Aotearoa New Zealand

39 35  
40 36 Sue Crengle, Ngāi Tahu Māori Health Research Unit, Division of Health Sciences, University  
41 37 of Otago, Dunedin Campus, Dunedin, Aotearoa New Zealand, ORCID: 0000-0001-9367-1492

42 38  
43 39 Key words: Health inequity, Implementation, Theories, Models, Frameworks, Facilitators,  
44 40 Barriers, Ethnicity

45 41  
46 42 Word count (excluding title page, abstract, references, figures and tables): 2023

1  
2  
3 43 **ABSTRACT**

4  
5 44 **Introduction**

6  
7  
8 45 Health inequities are differences in health between groups of people that are avoidable,  
9  
10 46 unfair and unjust. Achieving equitable health outcomes requires approaches that recognise  
11  
12 47 and account for the differences in levels of advantage between groups. Implementation  
13  
14 48 science, which studies how to translate evidence-based interventions into routine practice,  
15  
16 49 is increasingly recognised as an approach to address health inequities by identifying factors  
17  
18 50 and processes that enable equitable implementation of interventions. This article describes  
19  
20 51 the protocol for a scoping review of the literature relating to the equitable implementation  
21  
22 52 of interventions, focusing on ethnicity-related health inequities. The scoping review aims to  
23  
24 53 identify equity-focused implementation science theories, models and frameworks (TMFs)  
25  
26 54 and to synthesise and analyse the evidence relating to the factors that aid or inhibit  
27  
28 55 equitable implementation of health interventions.

29  
30 56 **Methods and analysis**

31  
32  
33 57 The scoping review is guided by the methodology developed by Arksey and O'Malley and  
34  
35 58 enhanced by Levac and colleagues. Relevant literature will be identified by searching  
36  
37 59 electronic databases, grey literature, hand-searching key journals and searching the  
38  
39 60 reference lists and citations of studies that meet the inclusion criteria. We will focus on  
40  
41 61 literature published from 2011 to the present. Titles, abstracts and full-text articles will be  
42  
43 62 screened independently by two researchers; any disagreements will be resolved through  
44  
45 63 discussion with another researcher. Extracted data will be summarised and analysed to  
46  
47 64 address the scoping review aims.

48  
49 65 **Ethics and dissemination**

1  
2  
3 66 The scoping review will map the available literature on equity-focused implementation  
4  
5  
6 67 science TMFs and the facilitators and barriers to equitable implementation of interventions.  
7  
8 68 Ethical approval is not required. Dissemination of the results of the review will include  
9  
10 69 publications in peer-review journals and conference and stakeholder presentations. Findings  
11  
12  
13 70 from the review will support those implementing interventions to ensure that the  
14  
15 71 implementation pathway and processes are equitable, thereby improving health outcomes  
16  
17  
18 72 and reducing existing inequities.

### 73 **Strengths and limitations of this study**

- 74 • To the best of our knowledge, this will be the first scoping review of the literature on  
75 equity-focused implementation science TMFs and the facilitators and barriers to the  
76 equitable implementation of interventions.
- 77 • The review is based on triangulation of sources, which implies the use of a range of  
78 strategies to identify potentially relevant sources, including databases, grey  
79 literature, hand-searching key journals and reviewing the reference lists and  
80 citations of included studies.
- 81 • The scoping review will be limited to literature published in English and from 2011 to  
82 the present; this may bias the analysis by excluding potentially relevant sources.
- 83 • The grey literature search will focus on New Zealand, which may limit the  
84 generalisability of the findings to other health systems.

### 85 **INTRODUCTION**

86 Health inequities are differences in health between groups of people that are avoidable,  
87 unfair and unjust, where these groups may be defined socially, economically,  
88 demographically or geographically [1-3]. The causes of health inequities are complex and

1  
2  
3 89 multifactorial; historic and contemporary political, legal, social, economic and institutional  
4  
5 90 structures and processes shape how power and resources are distributed, disadvantaging  
6  
7  
8 91 some groups relative to others [3, 4]. Within the health system, inequities are perpetuated  
9  
10 92 through its structures, policies and processes, which manifest as a lack of services that are  
11  
12  
13 93 affordable, accessible and culturally responsive and safe, and involve actors at multiple  
14  
15 94 levels (e.g. healthcare professionals, administrators, managers, funders) [5].

16  
17  
18 95 Ethnicity and 'race'-related health inequities have been well-documented locally and  
19  
20 96 internationally, including in the social determinants of health, access and use of health  
21  
22 97 services, quality of care and health outcomes [5-10]. In Aotearoa New Zealand, there are  
23  
24 98 persistent inequities in the health of Māori (the Indigenous peoples), Pacific and other  
25  
26 99 minoritised groups when compared with the majority European-New Zealand population [8,  
27  
28 100 11]. Often these ethnicity-related inequities are evident after socioeconomic status and  
29  
30 101 geographic differences are accounted for [12]. While the implementation of evidence-based  
31  
32 102 interventions has contributed to overall improvements in morbidity and mortality,  
33  
34 103 inequities in access to and provision of health services and interventions (e.g. cardiovascular  
35  
36 104 disease risk assessment, cancer screening, diabetes screening, vaccination) has meant the  
37  
38 105 health benefits of these interventions have been inequitable [8, 11, 13-19].

39  
40 106 Achieving equitable health outcomes requires approaches that recognise and account  
41  
42 107 for the differences in levels of advantage between groups [2]. Implementation science is  
43  
44 108 being increasingly recognised as an approach to reduce health inequities [20-26].  
45  
46 109 Implementation science is defined as the "scientific study of methods to promote the  
47  
48 110 systematic uptake of research findings and other evidence-based practices into routine  
49  
50 111 practice, and, hence, to improve the quality and effectiveness of health services and care"  
51  
52 112 [27]. Implementation research seeks to understand the multi-level factors influencing health

1  
2  
3 113 intervention design and delivery [4, 21]. Applying an 'equity lens' to implementation science  
4  
5  
6 114 can therefore facilitate understanding of the factors influencing the equitable design and  
7  
8 115 delivery of health interventions and guide the process of equitable implementation [4, 20,  
9  
10 116 26].

11  
12  
13 117 Implementation science utilises theories, models and frameworks (TMFs) as the basis for  
14  
15 118 understanding how and why implementation of an evidence-based intervention or practice  
16  
17 119 succeeds or fails [28]. Nilsen outlines three overarching aims of implementation science  
18  
19  
20 120 TMFs: (1) to describe and/or guide the process of translating research into practice, (2) to  
21  
22 121 understand and/or explain what influences implementation outcomes and (3) to evaluate  
23  
24 122 implementation [28]. A number of implementation science TMFs have been adapted or  
25  
26 123 developed in recent years to incorporate equity as an explicit focus [20, 23]. To the best of  
27  
28 124 our knowledge, these have yet to be comprehensively reviewed.

29  
30  
31  
32 125 Optimising an intervention's ability to address health inequities requires an  
33  
34 126 understanding of the factors that aid or inhibit equitable implementation. Identifying  
35  
36 127 facilitators and barriers to implementation enables intervention or service design and  
37  
38 128 delivery to be adapted to ensure that it meets the needs of the target population and  
39  
40 129 improves health outcomes [28]. Similarly, identifying the facilitators and barriers to  
41  
42 130 equitable implementation provides an opportunity to design or adapt the implementation  
43  
44 131 pathway to ensure that the intervention is delivered equitably.

45  
46  
47  
48  
49 132 The aim of the scoping review is to explore the literature relating to the equitable  
50  
51 133 implementation of health interventions. Our specific objectives are to: (1) identify and  
52  
53 134 describe implementation science TMFs that have an equity focus, including their purpose,  
54  
55 135 components and operationalisation (if applicable), and (2) identify and analyse literature  
56  
57 136 relating to the factors that aid or inhibit the achievement of equity in health intervention  
58  
59  
60

1  
2  
3 137 implementation. The scoping review will form part of the first phase of a research  
4  
5  
6 138 programme to develop an equity-focused implementation science framework and an equity  
7  
8 139 readiness assessment tool appropriate for the Aotearoa New Zealand context. The results  
9  
10  
11 140 will also support health researchers, clinicians, funders and other decision-makers to  
12  
13 141 implement interventions to achieve equitable outcomes.

## 16 142 **METHODS AND ANALYSIS**

19 143 A scoping review is a type of knowledge synthesis that addresses an exploratory research  
20  
21  
22 144 question by identifying and mapping key concepts, evidence and research gaps in a  
23  
24 145 particular field or area [29]. The scoping review methodology allows exploration of the  
25  
26  
27 146 breadth of evidence from diverse sources, including grey literature, while not requiring an  
28  
29 147 assessment of the quality of the evidence [30, 31]. It is also critical in examining the extent,  
30  
31  
32 148 variety and characteristics of evidence on a particular topic or question by providing clarity  
33  
34 149 to the concepts and identifying the gaps in knowledge to inform practice, policy and future  
35  
36  
37 150 research [32]. As such, it has been identified as the most suitable methodology to review  
38  
39 151 the literature on equity-focused implementation science.

41 152 This scoping review will be conducted following the methodological framework  
42  
43  
44 153 developed by Arksey and O'Malley[30] and refined by Levac and colleagues [33]. These  
45  
46 154 authors outline a six-stage process for scoping reviews: (1) identifying the research  
47  
48  
49 155 question; (2) identifying the relevant studies; (3) study selection; (4) charting the data; (5)  
50  
51 156 collating, summarising and reporting the results; (6) consultation [30, 33]. The Preferred  
52  
53  
54 157 Reporting Items for Systematic Reviews and Meta-Analyses extension for Scoping Review  
55  
56 158 (PRISMA-ScR) checklist will be used to guide the reporting of the results [32]. As the scoping  
57  
58  
59 159 review process is iterative, changes to the protocol may be required as the review  
60



1  
2  
3 160 progresses. Any adjustments will be clearly documented and justified in the scoping review  
4  
5  
6 161 results.

7  
8 162 **Stage 1: identifying the research question**  
9

10 163 To guide the scoping review, two research questions have been developed in consultation  
11  
12  
13 164 with the research team: (1) What equity TMFs have been developed to inform the design  
14  
15 165 and implementation of interventions in the health sector? (2) What implementation factors  
16  
17  
18 166 aid or inhibit the achievement of equity in health interventions?  
19

20  
21 167 **Stage 2: identifying relevant studies**  
22

23 168 Literature will be identified in four phases: (1) electronic database searching, (2) grey  
24  
25  
26 169 literature searching, (3) hand-searching of key journals, and (4) searching the reference lists  
27  
28 170 and citations of studies meeting the inclusion criteria.  
29

30  
31 171 The MEDLINE (Ovid) and CINAHL databases will be used to search for literature relating  
32  
33 172 to the research questions published from 2011 to the present. Initial search terms were  
34  
35 173 developed in consultation with a subject librarian at the University of Otago and reviewed  
36  
37  
38 174 by the research team. Preliminary searches were conducted in MEDLINE and the search  
39  
40  
41 175 terms and strategies were refined based on screening article titles, abstracts and keywords  
42  
43 176 (see Table 1 for the MEDLINE search strategy). The MEDLINE search strategy will be adapted  
44  
45 177 for the CINAHL database (see online supplemental file 1). The Dissemination and  
46  
47  
48 178 Implementation Models database (<https://dissemination-implementation.org/index.aspx>)  
49  
50 179 will also be searched to identify any additional implementation science TMFs with a health  
51  
52  
53 180 equity focus (see online supplemental file 1). International and local sources from the  
54  
55 181 published literature will be eligible for inclusion. The grey literature search will be limited to  
56  
57  
58 182 New Zealand as we are particularly interested in scoping the literature on the factors that  
59  
60 183 influence whether the implementation of an intervention has an impact on health inequities

184 in Māori and Pacific populations. The key journal titles to be hand-searched will be finalised  
 185 once the database searches are completed and the most relevant journals have been  
 186 identified. As with the database searches, the grey literature and key journal searches will  
 187 be limited to literature published from 2011 to the present.

188 **Table 1.** Search strategy developed in MEDLINE.

| <b>Research question 1</b> |                                                                                                                                                                                                                    |
|----------------------------|--------------------------------------------------------------------------------------------------------------------------------------------------------------------------------------------------------------------|
| 1.                         | (implementation science or implementation framework or implementation research or implementation process or implementation effectiveness or knowledge transfer or knowledge exchange or knowledge translation).af. |
| 2.                         | (framework* or theor* or model* or checklist* or classifi* or categor* or concept* or tool or protocol).af.                                                                                                        |
| 3.                         | 1 and 2                                                                                                                                                                                                            |
| 4.                         | (health intervention or health care or healthcare or evidence-based intervention or evidence-based practice or health service*).af.                                                                                |
| 5.                         | 3 and 4                                                                                                                                                                                                            |
| 6.                         | limit 5 to (english language and humans and yr="2011 -Current")                                                                                                                                                    |
| 7.                         | (equity or health equity or inequal* or health inequal* or disparit* or health diparit* or inequit* or health inequit*).af.                                                                                        |
| 8.                         | 6 and 7                                                                                                                                                                                                            |
| <b>Research question 2</b> |                                                                                                                                                                                                                    |
| 1.                         | (implementation science or implementation framework or implementation research or implementation process or implementation effectiveness or knowledge transfer or knowledge exchange or knowledge translation).af. |
| 2.                         | (health intervention or health care or healthcare or evidence-based intervention or evidence-based practice or health service*).af.                                                                                |
| 3.                         | 1 and 2                                                                                                                                                                                                            |
| 4.                         | (equity or health equity or inequal* or health inequal* or disparit* or health diparit* or inequit* or health inequit*).af.                                                                                        |

- |                                                                                               |
|-----------------------------------------------------------------------------------------------|
| 5. 3 and 4                                                                                    |
| 6. limit 5 to (english language and humans and yr="2011 -Current")                            |
| 7. barrier* or hinder or obstacle* or imped*                                                  |
| 8. 6 and 7                                                                                    |
| 9. (facilitat* or enabl* or moderat* or influence* or impact or aid or assist or enhanc*).af. |
| 10. 6 and 9                                                                                   |

189

### 190 **Stage 3: study selection**

191 References identified through the MEDLINE, CINAHL and Dissemination and Implementation

192 Models databases will be exported to Endnote X9.3.3 to identify and remove any duplicates.

193 References will also be imported to Microsoft Excel Version 2102 and the titles and

194 abstracts screened independently by two researchers to determine at a broad level whether

195 they meet inclusion criteria and do not satisfy any exclusion criteria; any disagreements will

196 be resolved through discussion with a third researcher. Studies identified as likely eligible

197 for inclusion through the screening process will then undergo full-text review by at least two

198 researchers to make a final determination of eligibility for inclusion in the scoping review.

#### 199 **Criteria for research question 1**

200 Studies will be included if they (1) describe an equity-focused implementation science

201 TMF, or (2) utilise an established implementation science TMF to implement an intervention

202 in Indigenous or other minoritised ethnic populations known to experience health

203 inequities. Studies that describe the operationalisation of an equity-focused TMF will also be

204 included.

#### 205 **Criteria for research question 2**

206 Studies will be included if they (1) describe a health intervention implemented in target  
 207 populations experiencing ethnicity-related health inequities, or (2) describe a health  
 208 intervention implemented in whole populations, but where ethnicity-related inequities are  
 209 explicitly considered as part of the implementation process; and (3) refer to facilitators or  
 210 barriers to implementation.

#### 211 Exclusion criteria

212 Commentaries, discussion and working papers, editorials, letters, conference  
 213 proceedings and studies in non-English languages or that describe interventions conducted  
 214 in non-healthcare settings will be excluded. As this review focuses on ethnicity-related  
 215 health inequities, interventions implemented in populations experiencing other types of  
 216 inequity are beyond the scope of this study.

#### 217 **Stage 4: charting the data**

218 Studies will be charted in Microsoft Excel using a data charting form; separate charting  
 219 forms will be developed for the two research questions (Table 2). The data charting forms  
 220 will be piloted on five to ten studies by two researchers independently and revised as  
 221 necessary. Data charting will be completed by two researchers, with cross-checking by a  
 222 third researcher.

223 **Table 2.** Preliminary data charting forms for data collection from studies meeting the  
 224 inclusion criteria for research questions one and two.

| Research question 1                                                                                                                                                                                                                                                                                              | Research question 2                                                                                                                                                                         |
|------------------------------------------------------------------------------------------------------------------------------------------------------------------------------------------------------------------------------------------------------------------------------------------------------------------|---------------------------------------------------------------------------------------------------------------------------------------------------------------------------------------------|
| <ul style="list-style-type: none"> <li>• Study characteristics</li> <li>• Aims</li> <li>• Framework characteristics</li> <li>• Description/s of framework operationalisation (if available):               <ul style="list-style-type: none"> <li>○ Study demographics</li> <li>○ Setting</li> </ul> </li> </ul> | <ul style="list-style-type: none"> <li>• Study characteristics</li> <li>• Aims</li> <li>• Description of the intervention</li> <li>• Facilitators and barriers to implementation</li> </ul> |

- |                                                                                     |  |
|-------------------------------------------------------------------------------------|--|
| <ul style="list-style-type: none"> <li>○ Methodology</li> <li>○ Outcomes</li> </ul> |  |
|-------------------------------------------------------------------------------------|--|

225

## 226 **Stage 5: collating, summarising and reporting the results**

227 A descriptive summary of the equity-focused implementation science TMFs and the  
 228 literature describing the facilitators and barriers to equitable implementation will be  
 229 provided. An analysis of the findings in relation to the research questions will be presented,  
 230 including how well equity and system-level factors influencing implementation are  
 231 incorporated into the implementation science TMFs and a thematic analysis of the  
 232 implementation factors aiding or inhibiting the achievement of equity in health  
 233 interventions.

## 234 **Stage 6: consultation**

235 Consultation with experts and stakeholders is recommended throughout the scoping review  
 236 process [29, 34]. It is also a critical aspect of the Kaupapa Māori research methodology\* that  
 237 informs the wider research programme [35]. The research team includes experts in the  
 238 fields of health equity (SC, KB), implementation science (PC) and Māori health (SC, RB, MR)  
 239 who will review the search findings and identify any potentially relevant literature that is  
 240 missing. A Kāhui (group) comprising experts in Māori health research and service provision,  
 241 Iwi (tribe) representatives and health service consumers will also be consulted to identify  
 242 any potentially relevant local resources that are not identified through the grey literature  
 243 search. The Kāhui will also review and provide feedback on the findings of the review as it  
 244 progresses.

1  
2  
3 245 \* Kaupapa Māori (literally, a Māori way) research “assumes the existence and validity of Māori knowledge,  
4  
5 246 language and culture” (p.48)[36] and is underpinned by a set of principles that guide research by, with and for  
6  
7 247 Māori [36, 37].  
8  
9

## 10 248 **Patient and public involvement**

11  
12  
13 249 No patients were involved in the protocol design.  
14

## 15 250 **ETHICS AND DISSEMINATION**

16  
17  
18  
19 251 Ethical approval will not be required for this scoping review as all data reviewed and  
20  
21 252 collected will be obtained from publicly available sources. Dissemination of the scoping  
22  
23 253 review results will include publication in a peer-reviewed journal and presentations to  
24  
25 254 stakeholders and at conferences.  
26  
27  
28

29  
30 255 **Acknowledgements:** We thank Christy Ballard, the subject librarian for the Department of  
31  
32 256 Preventive and Social Medicine at the University of Otago, for her assistance in the  
33  
34 257 development of the search strategy. We also thank Associate Professor Nicole Rankin, Unit  
35  
36 258 Head for the Evaluation and Implementation Science Unit at the University of Melbourne,  
37  
38 259 for her guidance in developing the protocol methodology.  
39  
40  
41

42 260 **Authors' contributions:** SC, KB, PC, PP and AF conceptualised and designed this study. SC,  
43  
44 261 ML, PG and YAA developed the search strategy; KB, AF and PP contributed to methods  
45  
46 262 design. PG, YAA and ML drafted and edited the manuscript and SC, KB, PC, PP, AF, RB and  
47  
48 263 MR provided critical revisions. The final version was read and approved by all authors.  
49  
50  
51

52  
53 264 **Funding:** This work was supported by a Healthier Lives National Science Challenge grant  
54  
55 265 number HL-T32CR-08.  
56  
57

58 266 **Competing interests:** None.  
59  
60

267 **Patient consent for publication:** Not applicable.

## 268 REFERENCES

- 269 1. Whitehead M. The concepts and principles of equity and health. *Int J Health Serv* 1992;22(3):429-  
270 45. doi: 10.2190/986l-lhq6-2vte-yrrn
- 271 2. Ministry of Health. Achieving equity in health outcomes: summary of a discovery process.  
272 Wellington, NZ: Ministry of Health; 2019. Available:  
273 [https://www.health.govt.nz/system/files/documents/publications/achieving-equity-in-](https://www.health.govt.nz/system/files/documents/publications/achieving-equity-in-health-outcomes-summary-of-a-discovery-process-30jul2019.pdf)  
274 [health-outcomes-summary-of-a-discovery-process-30jul2019.pdf](https://www.health.govt.nz/system/files/documents/publications/achieving-equity-in-health-outcomes-summary-of-a-discovery-process-30jul2019.pdf) (accessed 23 Feb 2022).
- 275 3. World Health Organization. Health equity. 2022. Available: [https://www.who.int/health-](https://www.who.int/health-topics/health-equity#tab=tab_1)  
276 [topics/health-equity#tab=tab\\_1](https://www.who.int/health-topics/health-equity#tab=tab_1) (accessed 23 Feb 2022).
- 277 4. Baumann AA, Cabassa LJ. Reframing implementation science to address inequities in healthcare  
278 delivery. *BMC Health Serv Res* 2020;20(1) doi: 10.1186/s12913-020-4975-3
- 279 5. Institute of Medicine (US) Committee on Understanding and Eliminating Racial and Ethnic  
280 Disparities in Health Care. Unequal treatment: confronting racial and ethnic disparities in  
281 health care. Washington, DC: National Academies Press 2002:1.
- 282 6. Anderson I, Robson B, Connolly M, et al. Indigenous and tribal peoples' health (The Lancet–Lowitja  
283 Institute Global Collaboration): a population study. *Lancet* 2016;388(10040):131-57. doi:  
284 [https://doi.org/10.1016/S0140-6736\(16\)00345-7](https://doi.org/10.1016/S0140-6736(16)00345-7)
- 285 7. Kapadia D, Zhang J, Salway S, et al. Ethnic inequalities in healthcare: a rapid evidence review.  
286 London, UK: NHS Race and Health Observatory; 2022. Available: [http://www.nhsrho.org/wp-](http://www.nhsrho.org/wp-content/uploads/2022/02/RHO-Rapid-Review-Final-Report_v.7.pdf)  
287 [content/uploads/2022/02/RHO-Rapid-Review-Final-Report\\_v.7.pdf](http://www.nhsrho.org/wp-content/uploads/2022/02/RHO-Rapid-Review-Final-Report_v.7.pdf) (accessed 25 Feb 2022).
- 288 8. Ryan D, Grey C, Mischewski B. Tofa Saili: A review of evidence about health equity for Pacific  
289 Peoples in New Zealand. Wellington, NZ: Pacific Perspectives; 2019. Available:  
290 <https://www.pacificperspectives.co.nz/publications> (accessed 25 Feb 2022).
- 291 9. Reid P, Robson B. Understanding health inequities. In: Robson B, Harris R, eds. Hauora: Māori  
292 Standards of Health IV: A study of the years 2000–2005. Wellington, NZ: Te Rōpū Rangahau  
293 Hauora a Eru Pōmare 2007:3–10.
- 294 10. Waitangi Tribunal. Hauora: Report on stage one of the health services and outcomes Kaupapa  
295 inquiry. Wellington, NZ: Waitangi Tribunal; 2019. Available:  
296 [https://forms.justice.govt.nz/search/Documents/WT/wt\\_DOC\\_152801817/Hauora%20W.pdf](https://forms.justice.govt.nz/search/Documents/WT/wt_DOC_152801817/Hauora%20W.pdf)  
297 [f](https://forms.justice.govt.nz/search/Documents/WT/wt_DOC_152801817/Hauora%20W.pdf) (accessed 11 April 2022).
- 298 11. Health Quality & Safety Commission. Health Quality & Safety Commission. He matapihi ki te  
299 kounga o ngā manaakitanga ā-haoura o Aotearoa 2019. A window on the quality of  
300 Aotearoa New Zealand's health care 2019. Wellington, NZ: HQSC; 2019. Available:  
301 [https://www.hqsc.govt.nz/assets/Uploads/Window\\_2019\\_web\\_final.pdf](https://www.hqsc.govt.nz/assets/Uploads/Window_2019_web_final.pdf) (accessed 25 Feb  
302 2022).
- 303 12. Ministry of Health. Unequal Impact II: Māori and non-Māori cancer statistics by deprivation and  
304 rural-urban status 2002–2006. Wellington, NZ: Ministry of Health; 2010. Available:  
305 [https://www.health.govt.nz/publication/unequal-impact-ii-maori-and-non-maori-cancer-](https://www.health.govt.nz/publication/unequal-impact-ii-maori-and-non-maori-cancer-statistics-deprivation-and-rural-urban-status-2002-2006)  
306 [statistics-deprivation-and-rural-urban-status-2002-2006](https://www.health.govt.nz/publication/unequal-impact-ii-maori-and-non-maori-cancer-statistics-deprivation-and-rural-urban-status-2002-2006) (accessed 11 April 2022).
- 307 13. Lawrenson R, Seneviratne S, Scott N, et al. Breast cancer inequities between Māori and non-  
308 Māori women in Aotearoa/New Zealand. *Eur J Cancer Care (Engl)* 2016;25(2):225-30. doi:  
309 10.1111/ecc.12473
- 310 14. Gurney J, Campbell S, Jackson C, et al. Equity by 2030: achieving equity in survival for Maori  
311 cancer patients. *N Z Med J* 2019;132(1506):66-76.
- 312 15. Ministry of Health. National and DHB immunisation data. Wellington, NZ: Ministry of Health;  
313 2021. Available: [https://www.health.govt.nz/our-work/preventative-health-](https://www.health.govt.nz/our-work/preventative-health-wellness/immunisation/immunisation-coverage/national-and-dhb-immunisation-data)  
314 [wellness/immunisation/immunisation-coverage/national-and-dhb-immunisation-data](https://www.health.govt.nz/our-work/preventative-health-wellness/immunisation/immunisation-coverage/national-and-dhb-immunisation-data)  
315 (accessed 04 Mar 2022).



- 1  
2  
3 316 16. Huria T, Palmer S, Beckert L, et al. Inequity in dialysis related practices and outcomes in  
4 317 Aotearoa/New Zealand: a Kaupapa Māori analysis. *Int J Equity Health* 2018;17(1) doi:  
5 318 10.1186/s12939-018-0737-9  
6  
7 319 17. Te Karu L, Dalbeth N, Stamp LK. Inequities in people with gout: a focus on Māori (Indigenous  
8 320 People) of Aotearoa New Zealand. *Ther Adv Musculoskelet Dis* 2021;13 doi:  
9 321 10.1177/1759720x2111028007  
10 322 18. Gu Y, Warren J, Kennelly J, et al. Cardiovascular disease risk management for Maori in New  
11 323 Zealand general practice. *J Prim Health Care* 2014;6(4):286-94.  
12 324 19. Disney G, McDonald A, Atkinson J, et al. New Zealand census mortality and cancer trends study  
13 325 data explorer. 2016. Available: <https://nzcms-ct-data-explorer.shinyapps.io/version8/>  
14 326 (accessed 25 Feb 2022).  
15 327 20. Brownson RC, Kumanyika SK, Kreuter MW, et al. Implementation science should give higher  
16 328 priority to health equity. *Implement Sci* 2021;16(1):28. doi: 10.1186/s13012-021-01097-0  
17 329 21. Chinman M, Woodward EN, Curran GM, et al. Harnessing implementation science to increase the  
18 330 impact of health equity research. *Medical Care* 2017;55(Suppl 2):S16-S23. doi:  
19 331 10.1097/mlr.0000000000000769  
20 332 22. McNulty M, Smith JD, Villamar J, et al. Implementation research methodologies for achieving  
21 333 scientific equity and health equity. *Ethn Dis* 2019;29(Suppl 1):83-92. doi:  
22 334 10.18865/ed.29.S1.83  
23 335 23. Odeny B. Closing the health equity gap: A role for implementation science? *PLoS Med* 2021;18(9)  
24 336 doi: 10.1371/journal.pmed.1003762  
25 337 24. Watkins C, Hornack R. A review of implementation science theories, models and frameworks  
26 338 through an equity lens. Chapel Hill, NC: National Implementation Research Network,  
27 339 University of North Carolina; 2022. Available: [https://nirn.fpg.unc.edu/practicing-  
28 340 implementation/review-implementation-science-theories-models-and-frameworks-through](https://nirn.fpg.unc.edu/practicing-implementation/review-implementation-science-theories-models-and-frameworks-through)  
29 341 (accessed 18 Feb 2022).  
30 342 25. Woodward E, Adsul P, Shelton R, et al. Bringing a health equity lens to implementation science  
31 343 frameworks. St. Louis, MO: Institute for Public Health, Washington University; 2021.  
32 344 Available: [https://publichealth.wustl.edu/bringing-a-health-equity-lens-to-implementation-  
33 345 science-frameworks/](https://publichealth.wustl.edu/bringing-a-health-equity-lens-to-implementation-science-frameworks/) (accessed 18 Feb 2022).  
34 346 26. DuMont K, Metz A, Woo B. Five recommendations for how implementation science can better  
35 347 advance equity. Washington, DC: Academy Health; 2019. Available:  
36 348 [https://academyhealth.org/blog/2019-04/five-recommendations-how-implementation-  
37 349 science-can-better-advance-equity](https://academyhealth.org/blog/2019-04/five-recommendations-how-implementation-science-can-better-advance-equity) (accessed 23 Feb 2022).  
38 350 27. Eccles MP, Mittman BS. Welcome to implementation science. *Implement Sci* 2006;1(1) doi:  
39 351 10.1186/1748-5908-1-1  
40 352 28. Nilsen P. Making sense of implementation theories, models and frameworks. *Implement Sci*  
41 353 2015;10:53. doi: 10.1186/s13012-015-0242-0  
42 354 29. Colquhoun HL, Levac D, O'Brien KK, et al. Scoping reviews: time for clarity in definition, methods,  
43 355 and reporting. *J Clin Epidemiol* 2014;67(12):1291-4. doi: 10.1016/j.jclinepi.2014.03.013  
44 356 30. Arksey H, O'Malley L. Scoping studies: towards a methodological framework. *Int J Soc Res*  
45 357 *Methodol* 2005;8(1):19-32. doi: 10.1080/1364557032000119616  
46 358 31. Rankin NM, McGregor D, Stone E, et al. Evidence-practice gaps in lung cancer: A scoping review.  
47 359 *Eur J Cancer Care (Engl)* 2018;27(2) doi: 10.1111/ecc.12588  
48 360 32. Tricco AC, Lillie E, Zarin W, et al. PRISMA Extension for Scoping Reviews (PRISMA-ScR): Checklist  
49 361 and explanation. *Ann Intern Med* 2018;169(7):467-73. doi: 10.7326/M18-0850  
50 362 33. Levac D, Colquhoun H, O'Brien K. Scoping studies: advancing the methodology. *Implement Sci*  
51 363 2010;5(1) doi: 10.1186/1748-5908-5-69  
52 364 34. Peters M, Godfrey C, McInerney P, et al. Chapter 11: Scoping reviews (2020 version). In:  
53 365 Aromatais E, Munn Z, eds. *JBIManual for Evidence Synthesis*: JBI 2020.



- 1  
2  
3 366 35. Cram F. Talking Ourselves UP. *AlterNative: An International Journal of Indigenous Peoples*  
4 367 2006;2(1):28-43. doi: 10.1177/117718010600200102  
5 368 36. Smith LT. Kaupapa Māori research- Some Kaupapa Māori principles. In: Pihama L, South K, eds.  
6 369 Kaupapa Rangahau A Reader: A Collection of Readings from the Kaupapa Maori Research  
7 370 Workshop Series Led. Hamilton, NZ: Te Kotahi Research Institute 2015:46-52.  
8 371 37. Cram F. Kaupapa Māori Health Research. In: Liamputtong P, ed. Handbook of Research Methods  
9 372 in Health Social Sciences. Singapore: Springer Singapore 2019:1507-24.

11  
12 373  
13  
14  
15  
16  
17  
18  
19  
20  
21  
22  
23  
24  
25  
26  
27  
28  
29  
30  
31  
32  
33  
34  
35  
36  
37  
38  
39  
40  
41  
42  
43  
44  
45  
46  
47  
48  
49  
50  
51  
52  
53  
54  
55  
56  
57  
58  
59  
60

For peer review only

1  
2  
3 **Supplemental file 1. Database search strategies.**  
4  
5

6 **MEDLINE search strategy**  
7

| <b>Research question 1</b> |                                                                                                                                                                                                                    |
|----------------------------|--------------------------------------------------------------------------------------------------------------------------------------------------------------------------------------------------------------------|
| 1.                         | (implementation science or implementation framework or implementation research or implementation process or implementation effectiveness or knowledge transfer or knowledge exchange or knowledge translation).af. |
| 2.                         | (framework* or theor* or model* or checklist* or classifi* or categor* or concept* or tool or protocol).af.                                                                                                        |
| 3.                         | 1 and 2                                                                                                                                                                                                            |
| 4.                         | (health intervention or health care or healthcare or evidence-based intervention or evidence-based practice or health service*).af.                                                                                |
| 5.                         | 3 and 4                                                                                                                                                                                                            |
| 6.                         | limit 5 to (english language and humans and yr="2011 -Current")                                                                                                                                                    |
| 7.                         | (equity or health equity or inequal* or health inequal* or disparit* or health diparit* or inequit* or health inequit*).af.                                                                                        |
| 8.                         | 6 and 7                                                                                                                                                                                                            |
| <b>Research question 2</b> |                                                                                                                                                                                                                    |
| 1.                         | (implementation science or implementation framework or implementation research or implementation process or implementation effectiveness or knowledge transfer or knowledge exchange or knowledge translation).af. |
| 2.                         | (health intervention or health care or healthcare or evidence-based intervention or evidence-based practice or health service*).af.                                                                                |
| 3.                         | 1 and 2                                                                                                                                                                                                            |
| 4.                         | (equity or health equity or inequal* or health inequal* or disparit* or health diparit* or inequit* or health inequit*).af.                                                                                        |
| 5.                         | 3 and 4                                                                                                                                                                                                            |
| 6.                         | limit 5 to (english language and humans and yr="2011 -Current")                                                                                                                                                    |
| 7.                         | barrier* or hinder or obstacle* or imped*                                                                                                                                                                          |
| 8.                         | 6 and 7                                                                                                                                                                                                            |
| 9.                         | (facilitat* or enabl* or moderat* or influence* or impact or aid or assist or enhanc*).af.                                                                                                                         |
| 10.                        | 6 and 9                                                                                                                                                                                                            |

## CINAHL search strategy

| Research question 1 |                                                                                                                                                                                                              |
|---------------------|--------------------------------------------------------------------------------------------------------------------------------------------------------------------------------------------------------------|
| 1.                  | implementation science or implementation framework or implementation research or implementation process or implementation effectiveness or knowledge transfer or knowledge exchange or knowledge translation |
| 2.                  | framework* or theor* or model* or checklist* or classifi* or categor* or concept* or tool or protocol                                                                                                        |
| 3.                  | S1 AND S2                                                                                                                                                                                                    |
| 4.                  | health intervention or health care or healthcare or evidence-based intervention or evidence-based practice or health service*                                                                                |
| 5.                  | S3 AND S4; Limiters - Published Date: 20110101-20220131 ; English Language; Human                                                                                                                            |
| 6.                  | equity or health equity or inequal* or health inequal* or disparit* or health diparit* or inequit* or health inequit*                                                                                        |
| 7.                  | S5 AND S6                                                                                                                                                                                                    |
| Research question 2 |                                                                                                                                                                                                              |
| 1.                  | implementation science or implementation framework or implementation research or implementation process or implementation effectiveness or knowledge transfer or knowledge exchange or knowledge translation |
| 2.                  | health intervention or health care or healthcare or evidence-based intervention or evidence-based practice or health service*                                                                                |
| 3.                  | S1 AND S2                                                                                                                                                                                                    |
| 4.                  | equity or health equity or inequal* or health inequal* or disparit* or health diparit* or inequit* or health inequit*                                                                                        |
| 5.                  | S3 AND S4; Limiters - Published Date: 20110101-20220131 ; English Language; Human                                                                                                                            |
| 6.                  | barrier* or hinder or obstacle* or imped*                                                                                                                                                                    |
| 7.                  | S5 AND S6                                                                                                                                                                                                    |
| 8.                  | facilitat* or enabl* or moderat* or influence* or impact or aid or assist or enhanc*                                                                                                                         |
| 9.                  | S5 AND S8                                                                                                                                                                                                    |

## D&I database search strategy

| Search criteria: |                              |
|------------------|------------------------------|
| 1.               | D And/Or I: Implementation   |
| 2.               | Socio-Ecological levels: All |
| 3.               | Constructs: Health Equity    |

# BMJ Open

## Supporting implementation of interventions to address ethnicity-related health inequities: frameworks, facilitators, and barriers: A scoping review protocol

|                                 |                                                                                                                                                                                                                                                                                                                                                                                                                                                                                                                                                                                                                                                                                                                                                                                                                                                          |
|---------------------------------|----------------------------------------------------------------------------------------------------------------------------------------------------------------------------------------------------------------------------------------------------------------------------------------------------------------------------------------------------------------------------------------------------------------------------------------------------------------------------------------------------------------------------------------------------------------------------------------------------------------------------------------------------------------------------------------------------------------------------------------------------------------------------------------------------------------------------------------------------------|
| Journal:                        | <i>BMJ Open</i>                                                                                                                                                                                                                                                                                                                                                                                                                                                                                                                                                                                                                                                                                                                                                                                                                                          |
| Manuscript ID                   | bmjopen-2022-065721.R1                                                                                                                                                                                                                                                                                                                                                                                                                                                                                                                                                                                                                                                                                                                                                                                                                                   |
| Article Type:                   | Protocol                                                                                                                                                                                                                                                                                                                                                                                                                                                                                                                                                                                                                                                                                                                                                                                                                                                 |
| Date Submitted by the Author:   | 20-Dec-2022                                                                                                                                                                                                                                                                                                                                                                                                                                                                                                                                                                                                                                                                                                                                                                                                                                              |
| Complete List of Authors:       | Gustafson, Papillon; University of Otago Division of Health Sciences, Ngāi Tahu Māori Health Research Unit<br>Abdul Aziz, Yasmin; University of Otago Division of Health Sciences, Ngāi Tahu Māori Health Research Unit<br>Lambert, Michelle; University of Otago Division of Health Sciences, Ngāi Tahu Māori Health Research Unit<br>Bartholomew, Karen; Waitemata District Health Board; Auckland District Health Board<br>Brown, Rachel; National Hauora Coalition<br>Carswell, Peter; Synergia Ltd<br>Fusheini, Adam; University of Otago Dunedin School of Medicine, Preventive and Social Medicine<br>Ratima, Mihi; Taumata Associates<br>Priest, Patricia; University of Otago Dunedin School of Medicine, Preventive and Social Medicine<br>Crengle, Sue; University of Otago Division of Health Sciences, Ngāi Tahu Māori Health Research Unit |
| <b>Primary Subject Heading</b>: | Health services research                                                                                                                                                                                                                                                                                                                                                                                                                                                                                                                                                                                                                                                                                                                                                                                                                                 |
| Secondary Subject Heading:      | Public health                                                                                                                                                                                                                                                                                                                                                                                                                                                                                                                                                                                                                                                                                                                                                                                                                                            |
| Keywords:                       | PUBLIC HEALTH, QUALITATIVE RESEARCH, Organisation of health services < HEALTH SERVICES ADMINISTRATION & MANAGEMENT, Quality in health care < HEALTH SERVICES ADMINISTRATION & MANAGEMENT, Health Equity                                                                                                                                                                                                                                                                                                                                                                                                                                                                                                                                                                                                                                                  |
|                                 |                                                                                                                                                                                                                                                                                                                                                                                                                                                                                                                                                                                                                                                                                                                                                                                                                                                          |

SCHOLARONE™  
Manuscripts

1  
2  
3 1 Supporting implementation of interventions to address ethnicity-related health inequities:  
4 2 frameworks, facilitators, and barriers: A scoping review protocol

5  
6 3

7  
8 4 Corresponding author: Professor Sue Crengle, PO Box 56, Dunedin, New Zealand 9054  
9 5 [sue.crengle@otago.ac.nz](mailto:sue.crengle@otago.ac.nz)

10  
11 6

12 7 Authors

13 8

14 9 Papillon Gustafson, Ngāi Tahu Māori Health Research Unit, Division of Health Sciences,  
15 10 University of Otago, Dunedin Campus, Dunedin, Aotearoa New Zealand, ORCID: 0000-0001-  
16 11 8645-8490

17 12

18 13 Yasmin Abdul Aziz, Ngāi Tahu Māori Health Research Unit, Division of Health Sciences,  
19 14 University of Otago, Dunedin Campus, Dunedin, Aotearoa New Zealand, ORCID: 0000-0002-  
20 15 0564-664X

21 16

22 17 Michelle Lambert, Ngāi Tahu Māori Health Research Unit, Division of Health Sciences,  
23 18 University of Otago, Dunedin Campus, Dunedin, Aotearoa New Zealand, ORCID: 0000-0002-  
24 19 0439-7557

25 20

26 21 Karen Bartholomew, Waitematā District Health Board and Auckland District Health Board,  
27 22 Auckland, Aotearoa New Zealand, ORCID: 0000-0002-1517-2134

28 23

29 24 Rachel Brown, National Hauora Coalition, Auckland, Aotearoa New Zealand

30 25

31 26 Peter Carswell, Synergia Ltd, Auckland, Aotearoa New Zealand

32 27

33 28 Adam Fusheini, Preventive and Social Medicine, University of Otago, Dunedin Campus,  
34 29 Dunedin, Aotearoa New Zealand, ORCID: 0000-0001-7896-3841

35 30

36 31 Mihi Ratima, Taumata Associates, Hāwera, Aotearoa New Zealand

37 32

38 33 Patricia Priest, Preventive and Social Medicine, University of Otago, Dunedin Campus,  
39 34 Dunedin, Aotearoa New Zealand

40 35

41 36 Sue Crengle, Ngāi Tahu Māori Health Research Unit, Division of Health Sciences, University  
42 37 of Otago, Dunedin Campus, Dunedin, Aotearoa New Zealand, ORCID: 0000-0001-9367-1492

43 38

44 39 Key words: Health inequity, Implementation, Theories, Models, Frameworks, Facilitators,  
45 40 Barriers, Ethnicity

46 41

47 42 Word count (excluding title page, abstract, references, figures and tables): 2328

48  
49  
50  
51  
52  
53  
54  
55  
56  
57  
58  
59  
60

1  
2  
3 **43 ABSTRACT**

4  
5 **44 Introduction**

6  
7  
8 45 Health inequities are differences in health between groups of people that are avoidable,  
9  
10 46 unfair and unjust. Achieving equitable health outcomes requires approaches that recognise  
11  
12 47 and account for the differences in levels of advantage between groups. Implementation  
13  
14 48 science, which studies how to translate evidence-based interventions into routine practice,  
15  
16 49 is increasingly recognised as an approach to address health inequities by identifying factors  
17  
18 50 and processes that enable equitable implementation of interventions. This article describes  
19  
20 51 the protocol for a scoping review of the literature relating to the equitable implementation  
21  
22 52 of interventions, focusing on ethnicity-related health inequities. The scoping review aims to  
23  
24 53 identify equity-focused implementation science theories, models and frameworks (TMFs)  
25  
26 54 and to synthesise and analyse the evidence relating to the factors that aid or inhibit  
27  
28 55 equitable implementation of health interventions.  
29

30  
31  
32  
33  
34  
35 **56 Methods and analysis**

36  
37  
38 57 The scoping review is guided by the methodology developed by Arksey and O'Malley and  
39  
40 58 enhanced by Levac and colleagues. Relevant literature will be identified by searching  
41  
42 59 electronic databases, grey literature, hand-searching key journals and searching the  
43  
44 60 reference lists and citations of studies that meet the inclusion criteria. We will focus on  
45  
46 61 literature published from 2011 to the present. Titles, abstracts and full-text articles will be  
47  
48 62 screened independently by two researchers; any disagreements will be resolved through  
49  
50 63 discussion with another researcher. Extracted data will be summarised and analysed to  
51  
52 64 address the scoping review aims.  
53  
54  
55

56  
57  
58 **65 Ethics and dissemination**  
59  
60

1  
2  
3 66 The scoping review will map the available literature on equity-focused implementation  
4  
5  
6 67 science TMFs and the facilitators and barriers to equitable implementation of interventions.  
7  
8 68 Ethical approval is not required. Dissemination of the results of the review will include  
9  
10 69 publications in peer-review journals and conference and stakeholder presentations. Findings  
11  
12  
13 70 from the review will support those implementing interventions to ensure that the  
14  
15 71 implementation pathway and processes are equitable, thereby improving health outcomes  
16  
17  
18 72 and reducing existing inequities.

### 73 **Strengths and limitations of this study**

- 74 • To the best of our knowledge, this will be the first scoping review of the literature on  
75 equity-focused implementation science TMFs and the facilitators and barriers to the  
76 equitable implementation of interventions.
- 77 • The review is based on triangulation of sources, which implies the use of a range of  
78 strategies to identify potentially relevant sources, including databases, grey  
79 literature, hand-searching key journals and reviewing the reference lists and  
80 citations of included studies.
- 81 • The scoping review will be limited to literature published in English and from 2011 to  
82 the present; this may bias the analysis by excluding potentially relevant sources.
- 83 • The grey literature search will focus on New Zealand, which may limit the  
84 generalisability of the findings to other health systems.

### 85 **INTRODUCTION**

86 Health inequities are differences in health between groups of people that are avoidable,  
87 unfair and unjust, where these groups may be defined socially, economically,  
88 demographically or geographically [1-3]. The causes of health inequities are complex and

1  
2  
3 89 multifactorial; historic and contemporary political, legal, social, economic and institutional  
4  
5  
6 90 structures and processes shape how power and resources are distributed, disadvantaging  
7  
8 91 some groups relative to others [3, 4]. Within the health system, inequities are perpetuated  
9  
10  
11 92 through its structures, policies and processes, which manifest as a lack of services that are  
12  
13 93 affordable, accessible and culturally responsive and safe, and involve actors at multiple  
14  
15 94 levels (e.g. healthcare professionals, administrators, managers, funders) [5].

16  
17  
18 95 Ethnicity and 'race'-related health inequities have been well-documented locally and  
19  
20 96 internationally [5-10]. Minoritised groups have poorer access to the social determinants of  
21  
22  
23 97 health, less access to and use of health services, poorer quality of care and worse health  
24  
25 98 outcomes, including reduced life expectancy and increased morbidity and mortality  
26  
27  
28 99 associated with various communicable and non-communicable diseases [5-10]. A  
29  
30 100 population study of Indigenous and tribal peoples in 23 countries, including Aotearoa New  
31  
32  
33 101 Zealand, Australia, Brazil and Canada, found poorer health and social outcomes compared  
34  
35 102 to non-Indigenous populations across a range of measures, although these differences were  
36  
37  
38 103 not uniform across each country or population [6]. In Aotearoa New Zealand, there are  
39  
40 104 persistent inequities in the health of Māori (the Indigenous peoples), Pacific and other  
41  
42  
43 105 minoritised groups when compared with the majority European-New Zealand population [8,  
44  
45 106 11]. Often these ethnicity-related inequities are evident after socioeconomic status and  
46  
47  
48 107 geographic differences are accounted for [12]. While the implementation of evidence-based  
49  
50 108 interventions has contributed to overall improvements in morbidity and mortality,  
51  
52  
53 109 inequities in access to and provision of health services and interventions (e.g. cardiovascular  
54  
55 110 disease risk assessment, cancer screening, diabetes screening, vaccination) has meant the  
56  
57 111 health benefits of these interventions have been inequitable [8, 11, 13-19].  
58  
59  
60



1  
2  
3 112 Achieving equitable health outcomes requires approaches that recognise and account  
4  
5  
6 113 for the differences in levels of advantage between groups [2]. Implementation science is  
7  
8 114 being increasingly recognised as an approach to reduce health inequities [20-26].  
9  
10 115 Implementation science is defined as the “scientific study of methods to promote the  
11  
12  
13 116 systematic uptake of research findings and other evidence-based practices into routine  
14  
15 117 practice, and, hence, to improve the quality and effectiveness of health services and care”  
16  
17  
18 118 [27]. Implementation research seeks to understand the multi-level factors influencing health  
19  
20 119 intervention design and delivery [4, 21]. Applying an ‘equity lens’ to implementation science  
21  
22  
23 120 can therefore facilitate understanding of the factors influencing the equitable design and  
24  
25 121 delivery of health interventions and guide the process of equitable implementation [4, 20,  
26  
27 122 26].

28  
29  
30 123 Implementation science utilises theories, models and frameworks (TMFs) as the basis for  
31  
32 124 understanding how and why implementation of an evidence-based intervention or practice  
33  
34  
35 125 succeeds or fails [28]. Nilsen outlines three overarching aims of implementation science  
36  
37 126 TMFs: (1) to describe and/or guide the process of translating research into practice, (2) to  
38  
39 127 understand and/or explain what influences implementation outcomes and (3) to evaluate  
40  
41  
42 128 implementation [28]. A number of implementation science TMFs have been adapted or  
43  
44  
45 129 developed in recent years to incorporate equity as an explicit focus [20, 23]. To the best of  
46  
47 130 our knowledge, these have yet to be comprehensively reviewed.

48  
49 131 Optimising an intervention’s ability to address health inequities requires an  
50  
51  
52 132 understanding of the factors that aid or inhibit equitable implementation. Identifying  
53  
54 133 facilitators and barriers to implementation enables intervention or service design and  
55  
56  
57 134 delivery to be adapted to ensure that it meets the needs of the target population and  
58  
59 135 improves health outcomes [28]. Similarly, identifying the facilitators and barriers to  
60

1  
2  
3 136 equitable implementation provides an opportunity to design or adapt the implementation  
4  
5  
6 137 pathway to ensure that the intervention is delivered equitably.  
7

8 138 The aim of the scoping review is to explore the literature relating to the equitable  
9  
10 139 implementation of health interventions. Our specific objectives are to: (1) identify and  
11  
12  
13 140 describe implementation science TMFs that have an equity focus, including their purpose,  
14  
15 141 components and operationalisation (if applicable), and (2) identify and analyse literature  
16  
17  
18 142 relating to the factors that aid or inhibit the achievement of equity in health intervention  
19  
20 143 implementation. A scoping review was identified as the most suitable methodology for the  
21  
22  
23 144 study as it is a type of knowledge synthesis that addresses an exploratory research question  
24  
25 145 by identifying and mapping key concepts, evidence and research gaps in a particular field or  
26  
27  
28 146 area [29]. In contrast to a systematic review, this methodology allows exploration of the  
29  
30 147 breadth of evidence from diverse sources, including grey literature, while not requiring an  
31  
32  
33 148 assessment of the quality of the evidence [30, 31]. It is also critical in examining the extent,  
34  
35 149 variety and characteristics of evidence on a particular topic or question by providing clarity  
36  
37  
38 150 to the concepts and identifying the gaps in knowledge to inform practice, policy and future  
39  
40 151 research [32]. The scoping review will form part of the first phase of a research programme  
41  
42  
43 152 to develop an equity-focused implementation science framework and an equity readiness  
44  
45 153 assessment tool appropriate for the Aotearoa New Zealand context. The results will also  
46  
47  
48 154 support health researchers, clinicians, funders and other decision-makers to implement  
49  
50 155 interventions to achieve equitable outcomes.  
51

## 52 53 156 **METHODS AND ANALYSIS** 54 55

56 157 This scoping review will be conducted following the methodological framework  
57  
58 158 developed by Arksey and O'Malley[30] and refined by Levac and colleagues [33]. These  
59  
60

1  
2  
3 159 authors outline a six-stage process for scoping reviews: (1) identifying the research  
4  
5  
6 160 question; (2) identifying the relevant studies; (3) study selection; (4) charting the data; (5)  
7  
8 161 collating, summarising and reporting the results; (6) consultation [30, 33]. The Preferred  
9  
10 162 Reporting Items for Systematic Reviews and Meta-Analyses extension for Scoping Review  
11  
12  
13 163 (PRISMA-ScR) checklist will be used to guide the reporting of the results [32]. As the scoping  
14  
15  
16 164 review process is iterative, changes to the protocol may be required as the review  
17  
18 165 progresses. Any adjustments will be clearly documented and justified in the scoping review  
19  
20 166 results.

### 167 **Stage 1: identifying the research question**

168 To guide the scoping review, two research questions have been developed in consultation  
169 with the research team: (1) What equity TMFs have been developed to inform the design  
170 and implementation of interventions in the health sector? (2) What implementation factors  
171 aid or inhibit the achievement of equity in health interventions?

### 172 **Stage 2: identifying relevant studies**

173 Literature will be identified in four phases: (1) electronic database searching, (2) grey  
174 literature searching, (3) hand-searching of key journals, and (4) searching the reference lists  
175 and citations of studies meeting the inclusion criteria.

176 The MEDLINE (Ovid) and CINAHL databases will be used to search for literature relating  
177 to the research questions published from 1 January, 2011 to the present. Preliminary  
178 searches revealed that discussions about equity in implementation science have occurred  
179 predominantly in the last five years. Therefore, limiting the search to 2011 onwards will  
180 provide good coverage of the implementation science literature, as well as ensuring that the  
181 search is current at the time it is executed. The list of initial search terms was developed  
182 from the research questions and previous knowledge, and reviewed by the research team.

1  
2  
3 183 The Research Fellow and a subject librarian at the University of Otago reviewed MeSH terms  
4  
5  
6 184 to ensure that the key search terms were comprehensive. Preliminary searches were  
7  
8 185 conducted in MEDLINE and the search terms and strategies were refined based on screening  
9  
10  
11 186 article titles, abstracts and keywords (see Table 1 for the MEDLINE search strategy). The  
12  
13 187 MEDLINE search strategy will be adapted for the CINAHL database (see online supplemental  
14  
15 188 file 1). The Dissemination and Implementation Models database ([https://dissemination-  
19  
20  
21 190 implementation.org/index.aspx](https://dissemination-<br/>16<br/>17<br/>18 189 implementation.org/index.aspx)) will also be searched to identify any additional  
22  
23 191 implementation science TMFs with a health equity focus (see online supplemental file 1).  
24  
25 192 International and local literature from the database searches will be eligible for inclusion.  
26  
27 192 The grey literature search will be conducted using Google and the following search terms:  
28  
29 193 “health” AND “equity” and “implementation” and “framework or model or theory”. This  
30  
31 194 search will be limited to New Zealand as we are particularly interested in scoping the  
32  
33 195 literature on the factors that influence whether the implementation of an intervention has  
34  
35 196 an impact on health inequities in Māori and Pacific populations. The key journal titles to be  
36  
37 197 hand-searched will be finalised once the database searches are completed and the most  
38  
39 198 relevant journals have been identified. As with the database searches, the grey literature  
40  
41 199 and key journal searches will be limited to literature published from 1 January, 2011 to the  
42  
43 200 present.  
44  
45  
46  
47

48 **Table 1.** Search strategy developed in MEDLINE.  
49

50 **Research question 1**

- 51  
52 1. (implementation science or implementation framework or implementation  
53 research or implementation process or implementation effectiveness or  
54 knowledge transfer or knowledge exchange or knowledge translation).af.  
55  
56 2. (framework\* or theor\* or model\* or checklist\* or classifi\* or categor\* or  
57  
58  
59  
60

|    |                                                                                     |
|----|-------------------------------------------------------------------------------------|
| 1  | concept* or tool or protocol).af.                                                   |
| 2  |                                                                                     |
| 3  |                                                                                     |
| 4  |                                                                                     |
| 5  | 3. 1 and 2                                                                          |
| 6  |                                                                                     |
| 7  | 4. (health intervention or health care or healthcare or evidence-based intervention |
| 8  | or evidence-based practice or health service*).af.                                  |
| 9  |                                                                                     |
| 10 | 5. 3 and 4                                                                          |
| 11 |                                                                                     |
| 12 | 6. limit 5 to (english language and humans and yr="2011 -Current")                  |
| 13 |                                                                                     |
| 14 | 7. (equity or health equity or inequal* or health inequal* or disparit* or health   |
| 15 | diparit* or inequit* or health inequit*).af.                                        |
| 16 |                                                                                     |
| 17 |                                                                                     |
| 18 | 8. 6 and 7                                                                          |
| 19 |                                                                                     |
| 20 |                                                                                     |
| 21 |                                                                                     |
| 22 | <b>Research question 2</b>                                                          |
| 23 |                                                                                     |
| 24 | 1. (implementation science or implementation framework or implementation            |
| 25 | research or implementation process or implementation effectiveness or               |
| 26 | knowledge transfer or knowledge exchange or knowledge translation).af.              |
| 27 |                                                                                     |
| 28 |                                                                                     |
| 29 | 2. (health intervention or health care or healthcare or evidence-based intervention |
| 30 | or evidence-based practice or health service*).af.                                  |
| 31 |                                                                                     |
| 32 |                                                                                     |
| 33 | 3. 1 and 2                                                                          |
| 34 |                                                                                     |
| 35 | 4. (equity or health equity or inequal* or health inequal* or disparit* or health   |
| 36 | diparit* or inequit* or health inequit*).af.                                        |
| 37 |                                                                                     |
| 38 |                                                                                     |
| 39 | 5. 3 and 4                                                                          |
| 40 |                                                                                     |
| 41 | 6. limit 5 to (english language and humans and yr="2011 -Current")                  |
| 42 |                                                                                     |
| 43 | 7. barrier* or hinder or obstacle* or impeded*                                      |
| 44 |                                                                                     |
| 45 | 8. 6 and 7                                                                          |
| 46 |                                                                                     |
| 47 | 9. (facilitat* or enabl* or moderat* or influence* or impact or aid or assist or    |
| 48 | enhanc*).af.                                                                        |
| 49 |                                                                                     |
| 50 | 10. 6 and 9                                                                         |
| 51 |                                                                                     |

202

### 203 Stage 3: study selection

204 References identified through the MEDLINE, CINAHL and Dissemination and Implementation

205 Models databases will be exported to Endnote X9.3.3 to identify and remove any duplicates.

1  
2  
3 206 References will also be imported to Microsoft Excel Version 2209 and the titles and  
4  
5  
6 207 abstracts screened independently by two researchers to determine at a broad level whether  
7  
8 208 they meet inclusion criteria and do not satisfy any exclusion criteria; any disagreements will  
9  
10  
11 209 be resolved through discussion with a third researcher. Studies identified as likely eligible  
12  
13 210 for inclusion through the screening process will then undergo full-text review by at least two  
14  
15 211 researchers to make a final determination of eligibility for inclusion in the scoping review.

16  
17  
18 212 To identify potentially relevant studies from relevant journals and reference lists by  
19  
20 213 handsearching, article titles will first be reviewed to determine whether they broadly meet  
21  
22 214 the inclusion criteria. The abstracts of potentially eligible articles will then be reviewed  
23  
24 215 according to the process described above for references identified through the database  
25  
26 216 searches. Grey literature and any literature identified by handsearching journals, reference  
27  
28 217 lists or citations will be manually added to Endnote and Microsoft Excel.

#### 29 30 31 32 33 218 Criteria for research question 1

34  
35  
36 219 Studies will be included if they (1) describe an equity-focused implementation science  
37  
38 220 TMF, i.e. equity is explicitly mentioned in the TMF or addressing health equity is an explicit  
39  
40 221 aim of the TMF, or (2) utilise an established implementation science TMF to implement an  
41  
42 222 intervention in Indigenous or other minoritised ethnic populations known to experience  
43  
44 223 health inequities. Studies that describe the operationalisation of an equity-focused TMF will  
45  
46 224 also be included.

#### 47 48 49 50 51 225 Criteria for research question 2

52  
53  
54 226 Studies will be included if they (1) describe a health intervention implemented in target  
55  
56 227 populations experiencing ethnicity-related health inequities, or (2) describe a health  
57  
58 228 intervention implemented in whole populations, but where ethnicity-related inequities are  
59  
60

229 explicitly considered as part of the implementation process; and (3) refer to facilitators or  
 230 barriers to implementation.

#### 231 Exclusion criteria

232 Commentaries, discussion and working papers, policy documents, editorials, expert  
 233 opinions, letters, conference proceedings, case reports, quantitative research that does not  
 234 otherwise meet the inclusion criteria for research question 1 or 2, and studies in non-English  
 235 languages or that describe interventions conducted in non-healthcare settings will be  
 236 excluded. As this review focuses on ethnicity-related health inequities, interventions  
 237 implemented in populations experiencing other types of inequity are beyond the scope of  
 238 this study.

#### 239 **Stage 4: charting the data**

240 Studies will be charted in Microsoft Excel using a data charting form; separate charting  
 241 forms will be developed for the two research questions (Table 2). The data charting forms  
 242 will be piloted on five to ten studies by two researchers independently. The researchers will  
 243 then meet to review the data charting process, make any necessary revisions to the data  
 244 charting form and check for consistency between the two researchers. Data charting will be  
 245 completed by two researchers, with cross-checking by a third researcher.

246 **Table 2.** Preliminary data charting forms for data collection from studies meeting the  
 247 inclusion criteria for research questions one and two.

| Research question 1                                                                                                                                                                                                                                                                                              | Research question 2                                                                                                                                                                         |
|------------------------------------------------------------------------------------------------------------------------------------------------------------------------------------------------------------------------------------------------------------------------------------------------------------------|---------------------------------------------------------------------------------------------------------------------------------------------------------------------------------------------|
| <ul style="list-style-type: none"> <li>• Study characteristics</li> <li>• Aims</li> <li>• Framework characteristics</li> <li>• Description/s of framework operationalisation (if available):               <ul style="list-style-type: none"> <li>○ Study demographics</li> <li>○ Setting</li> </ul> </li> </ul> | <ul style="list-style-type: none"> <li>• Study characteristics</li> <li>• Aims</li> <li>• Description of the intervention</li> <li>• Facilitators and barriers to implementation</li> </ul> |

- |                                                                                  |  |
|----------------------------------------------------------------------------------|--|
| <ul style="list-style-type: none"><li>○ Methodology</li><li>○ Outcomes</li></ul> |  |
|----------------------------------------------------------------------------------|--|

248

### 249 **Stage 5: collating, summarising and reporting the results**

250 A descriptive summary of the equity-focused implementation science TMFs and the  
251 literature describing the facilitators and barriers to equitable implementation will be  
252 provided. An analysis of the findings in relation to the research questions will be presented,  
253 including how well equity and system-level factors influencing implementation are  
254 incorporated into the implementation science TMFs and a thematic analysis of the  
255 implementation factors aiding or inhibiting the achievement of equity in health  
256 interventions.

### 257 **Stage 6: consultation**

258 Consultation with experts and stakeholders is recommended throughout the scoping review  
259 process [29, 34]. It is also a critical aspect of the Kaupapa Māori research methodology\* that  
260 informs the wider research programme [35]. The research team includes experts in the  
261 fields of health equity (SC, KB), implementation science (PC) and Māori health (SC, RB, MR)  
262 who will review the search findings and identify any potentially relevant literature that is  
263 missing. A Kāhui (group) comprising experts in Māori health research and service provision,  
264 Iwi (tribe) representatives and health service consumers will also be consulted to identify  
265 any potentially relevant local resources that are not identified through the grey literature  
266 search. The Kāhui will also review and provide feedback on the findings of the review as it  
267 progresses.



1  
2  
3 268 \* Kaupapa Māori (literally, a Māori way) research “assumes the existence and validity of Māori knowledge,  
4  
5 269 language and culture” (p.48)[36] and is underpinned by a set of principles that guide research by, with and for  
6  
7 270 Māori [36, 37].  
8  
9

### 10 271 **Patient and public involvement**

11  
12 272 No patients were involved in the protocol design.  
13  
14

### 15 273 **ETHICS AND DISSEMINATION**

16  
17  
18 274 Ethical approval will not be required for this scoping review as all data reviewed and  
19  
20 275 collected will be obtained from publicly available sources. Dissemination of the scoping  
21  
22 276 review results will include publication in a peer-reviewed journal and presentations to  
23  
24 277 stakeholders and at conferences.  
25  
26  
27  
28

29  
30 278 **Acknowledgements:** We thank Christy Ballard, the subject librarian for the Department of  
31  
32 279 Preventive and Social Medicine at the University of Otago, for her assistance in the  
33  
34 280 development of the search strategy. We also thank Associate Professor Nicole Rankin, Unit  
35  
36 281 Head for the Evaluation and Implementation Science Unit at the University of Melbourne,  
37  
38 282 for her guidance in developing the protocol methodology.  
39  
40  
41

42 283 **Authors' contributions:** SC, KB, PC, PP and AF conceptualised and designed this study. SC,  
43  
44 284 ML, PG and YAA developed the search strategy; KB, AF and PP contributed to methods  
45  
46 285 design. PG, YAA and ML drafted and edited the manuscript and SC, KB, PC, PP, AF, RB and  
47  
48 286 MR provided critical revisions. The final version was read and approved by all authors.  
49  
50  
51

52  
53 287 **Funding:** This work was supported by a Healthier Lives National Science Challenge grant  
54  
55 288 number HL-T32CR-08.  
56  
57

58 289 **Competing interests:** None.  
59  
60

290 **Patient consent for publication:** Not applicable.

## 291 REFERENCES

- 292 1. Whitehead M. The concepts and principles of equity and health. *Int J Health Serv* 1992;22(3):429-  
293 45. doi: 10.2190/986l-lhq6-2vte-yrrn
- 294 2. Ministry of Health. Achieving equity in health outcomes: summary of a discovery process.  
295 Wellington, NZ: Ministry of Health; 2019. Available:  
296 [https://www.health.govt.nz/system/files/documents/publications/achieving-equity-in-](https://www.health.govt.nz/system/files/documents/publications/achieving-equity-in-health-outcomes-summary-of-a-discovery-process-30jul2019.pdf)  
297 [health-outcomes-summary-of-a-discovery-process-30jul2019.pdf](https://www.health.govt.nz/system/files/documents/publications/achieving-equity-in-health-outcomes-summary-of-a-discovery-process-30jul2019.pdf) (accessed 10 Aug 2022).
- 298 3. World Health Organization. Health equity. 2022. Available: [https://www.who.int/health-](https://www.who.int/health-topics/health-equity#tab=tab_1)  
299 [topics/health-equity#tab=tab\\_1](https://www.who.int/health-topics/health-equity#tab=tab_1) (accessed 3 Aug 2022).
- 300 4. Baumann AA, Cabassa LJ. Reframing implementation science to address inequities in healthcare  
301 delivery. *BMC Health Serv Res* 2020;20(1) doi: 10.1186/s12913-020-4975-3
- 302 5. Institute of Medicine (US) Committee on Understanding and Eliminating Racial and Ethnic  
303 Disparities in Health Care. Unequal treatment: confronting racial and ethnic disparities in  
304 health care. Washington, DC: National Academies Press 2002:1.
- 305 6. Anderson I, Robson B, Connolly M, et al. Indigenous and tribal peoples' health (The Lancet–Lowitja  
306 Institute Global Collaboration): a population study. *Lancet* 2016;388(10040):131-57. doi:  
307 [https://doi.org/10.1016/S0140-6736\(16\)00345-7](https://doi.org/10.1016/S0140-6736(16)00345-7)
- 308 7. Kapadia D, Zhang J, Salway S, et al. Ethnic inequalities in healthcare: a rapid evidence review.  
309 London, UK: NHS Race and Health Observatory; 2022. Available: [http://www.nhsrho.org/wp-](http://www.nhsrho.org/wp-content/uploads/2022/02/RHO-Rapid-Review-Final-Report_v.7.pdf)  
310 [content/uploads/2022/02/RHO-Rapid-Review-Final-Report\\_v.7.pdf](http://www.nhsrho.org/wp-content/uploads/2022/02/RHO-Rapid-Review-Final-Report_v.7.pdf) (accessed 10 Aug 2022).
- 311 8. Ryan D, Grey C, Mischewski B. Tofa Saili: A review of evidence about health equity for Pacific  
312 Peoples in New Zealand. Wellington, NZ: Pacific Perspectives; 2019. Available:  
313 <https://www.pacificperspectives.co.nz/publications> (accessed 13 Jul 2022).
- 314 9. Reid P, Robson B. Understanding health inequities. In: Robson B, Harris R, eds. Hauora: Māori  
315 Standards of Health IV: A study of the years 2000–2005. Wellington, NZ: Te Rōpū Rangahau  
316 Hauora a Eru Pōmare 2007:3–10.
- 317 10. Waitangi Tribunal. Hauora: Report on stage one of the health services and outcomes Kaupapa  
318 inquiry. Wellington, NZ: Waitangi Tribunal; 2019. Available:  
319 [https://forms.justice.govt.nz/search/Documents/WT/wt\\_DOC\\_152801817/Hauora%20W.pdf](https://forms.justice.govt.nz/search/Documents/WT/wt_DOC_152801817/Hauora%20W.pdf)  
320 [f](https://forms.justice.govt.nz/search/Documents/WT/wt_DOC_152801817/Hauora%20W.pdf) (accessed 11 April 2022).
- 321 11. Health Quality & Safety Commission. Health Quality & Safety Commission. He matapihi ki te  
322 kounga o ngā manaakitanga ā-haoura o Aotearoa 2019. A window on the quality of  
323 Aotearoa New Zealand's health care 2019 Wellington, NZ: HQSC; 2019. Available:  
324 [https://www.hqsc.govt.nz/assets/Uploads/Window\\_2019\\_web\\_final.pdf](https://www.hqsc.govt.nz/assets/Uploads/Window_2019_web_final.pdf) (accessed 16 Jun  
325 2022).
- 326 12. Ministry of Health. Unequal Impact II: Māori and non-Māori cancer statistics by deprivation and  
327 rural-urban status 2002–2006. Wellington, NZ: Ministry of Health; 2010. Available:  
328 [https://www.health.govt.nz/publication/unequal-impact-ii-maori-and-non-maori-cancer-](https://www.health.govt.nz/publication/unequal-impact-ii-maori-and-non-maori-cancer-statistics-deprivation-and-rural-urban-status-2002-2006)  
329 [statistics-deprivation-and-rural-urban-status-2002-2006](https://www.health.govt.nz/publication/unequal-impact-ii-maori-and-non-maori-cancer-statistics-deprivation-and-rural-urban-status-2002-2006) (accessed 11 April 2022).
- 330 13. Lawrenson R, Seneviratne S, Scott N, et al. Breast cancer inequities between Māori and non-  
331 Māori women in Aotearoa/New Zealand. *Eur J Cancer Care (Engl)* 2016;25(2):225-30. doi:  
332 10.1111/ecc.12473
- 333 14. Gurney J, Campbell S, Jackson C, et al. Equity by 2030: achieving equity in survival for Maori  
334 cancer patients. *N Z Med J* 2019;132(1506):66-76.
- 335 15. Ministry of Health. National and DHB immunisation data. Wellington, NZ: Ministry of Health;  
336 2021. Available: [https://www.health.govt.nz/our-work/preventative-health-](https://www.health.govt.nz/our-work/preventative-health-wellness/immunisation/immunisation-coverage/national-and-dhb-immunisation-data)  
337 [wellness/immunisation/immunisation-coverage/national-and-dhb-immunisation-data](https://www.health.govt.nz/our-work/preventative-health-wellness/immunisation/immunisation-coverage/national-and-dhb-immunisation-data)  
338 (accessed 13 Jul 2022).

- 1  
2  
3 339 16. Huria T, Palmer S, Beckert L, et al. Inequity in dialysis related practices and outcomes in  
4 340 Aotearoa/New Zealand: a Kaupapa Māori analysis. *Int J Equity Health* 2018;17(1) doi:  
5 341 10.1186/s12939-018-0737-9  
6 342 17. Te Karu L, Dalbeth N, Stamp LK. Inequities in people with gout: a focus on Māori (Indigenous  
7 343 People) of Aotearoa New Zealand. *Ther Adv Musculoskelet Dis* 2021;13 doi:  
8 344 10.1177/1759720x2111028007  
9 345 18. Gu Y, Warren J, Kennelly J, et al. Cardiovascular disease risk management for Maori in New  
10 346 Zealand general practice. *J Prim Health Care* 2014;6(4):286-94.  
11 347 19. Disney G, McDonald A, Atkinson J, et al. New Zealand census mortality and cancer trends study  
12 348 data explorer. 2016. Available: <https://nzcms-ct-data-explorer.shinyapps.io/version8/>  
13 349 (accessed 25 Feb 2022).  
14 350 20. Brownson RC, Kumanyika SK, Kreuter MW, et al. Implementation science should give higher  
15 351 priority to health equity. *Implement Sci* 2021;16(1):28. doi: 10.1186/s13012-021-01097-0  
16 352 21. Chinman M, Woodward EN, Curran GM, et al. Harnessing implementation science to increase the  
17 353 impact of health equity research. *Med Care* 2017;55(Suppl 2):S16-S23. doi:  
18 354 10.1097/mlr.0000000000000769  
19 355 22. McNulty M, Smith JD, Villamar J, et al. Implementation research methodologies for achieving  
20 356 scientific equity and health equity. *Ethn Dis* 2019;29(Suppl 1):83-92. doi:  
21 357 10.18865/ed.29.S1.83  
22 358 23. Odeny B. Closing the health equity gap: A role for implementation science? *PLoS Med* 2021;18(9)  
23 359 doi: 10.1371/journal.pmed.1003762  
24 360 24. Watkins C, Hornack R. A review of implementation science theories, models and frameworks  
25 361 through an equity lens. Chapel Hill, NC: National Implementation Research Network,  
26 362 University of North Carolina; 2022. Available: [https://nirn.fpg.unc.edu/practicing-  
27 363 implementation/review-implementation-science-theories-models-and-frameworks-through](https://nirn.fpg.unc.edu/practicing-implementation/review-implementation-science-theories-models-and-frameworks-through)  
28 364 (accessed 18 Feb 2022).  
29 365 25. Woodward E, Adsul P, Shelton R, et al. Bringing a health equity lens to implementation science  
30 366 frameworks St. Louis, MO: Institute for Public Health, Washington University; 2021.  
31 367 Available: [https://publichealth.wustl.edu/bringing-a-health-equity-lens-to-implementation-  
32 368 science-frameworks/](https://publichealth.wustl.edu/bringing-a-health-equity-lens-to-implementation-science-frameworks/) (accessed 12 Jul 2022).  
33 369 26. DuMont K, Metz A, Woo B. Five recommendations for how implementation science can better  
34 370 advance equity. Washington, DC: Academy Health; 2019. Available:  
35 371 [https://academyhealth.org/blog/2019-04/five-recommendations-how-implementation-  
36 372 science-can-better-advance-equity](https://academyhealth.org/blog/2019-04/five-recommendations-how-implementation-science-can-better-advance-equity) (accessed 18 Jul 2022).  
37 373 27. Eccles MP, Mittman BS. Welcome to implementation science. *Implement Sci* 2006;1(1) doi:  
38 374 10.1186/1748-5908-1-1  
39 375 28. Nilsen P. Making sense of implementation theories, models and frameworks. *Implement Sci*  
40 376 2015;10:53. doi: 10.1186/s13012-015-0242-0  
41 377 29. Colquhoun HL, Levac D, O'Brien KK, et al. Scoping reviews: time for clarity in definition, methods,  
42 378 and reporting. *J Clin Epidemiol* 2014;67(12):1291-4. doi: 10.1016/j.jclinepi.2014.03.013  
43 379 30. Arksey H, O'Malley L. Scoping studies: towards a methodological framework. *Int J Soc Res*  
44 380 *Methodol* 2005;8(1):19-32. doi: 10.1080/1364557032000119616  
45 381 31. Rankin NM, McGregor D, Stone E, et al. Evidence-practice gaps in lung cancer: a scoping review.  
46 382 *Eur J Cancer Care (Engl)* 2018;27(2) doi: 10.1111/ecc.12588  
47 383 32. Tricco AC, Lillie E, Zarin W, et al. PRISMA extension for scoping reviews (PRISMA-ScR): checklist  
48 384 and explanation. *Ann Intern Med* 2018;169(7):467-73. doi: 10.7326/M18-0850  
49 385 33. Levac D, Colquhoun H, O'Brien K. Scoping studies: advancing the methodology. *Implement Sci*  
50 386 2010;5(1) doi: 10.1186/1748-5908-5-69  
51 387 34. Peters M, Godfrey C, McInerney P, et al. Chapter 11: Scoping reviews (2020 version). In:  
52 388 Aromatais E, Munn Z, eds. *JBIM Manual for Evidence Synthesis*: JBI 2020.

- 1  
2  
3 389 35. Cram F. Talking ourselves UP. *AlterNative: An International Journal of Indigenous Peoples*  
4 390 2006;2(1):28-43. doi: 10.1177/117718010600200102  
5 391 36. Smith LT. Kaupapa Māori research- Some Kaupapa Māori principles. In: Pihama L, South K, eds.  
6 392 Kaupapa Rangahau A Reader: A Collection of Readings from the Kaupapa Maori Research  
7 393 Workshop Series Led. Hamilton, NZ: Te Kotahi Research Institute 2015:46-52.  
8 394 37. Cram F. Kaupapa Māori health research. In: Liamputtong P, ed. Handbook of research methods in  
9 395 health social sciences. Singapore: Springer Singapore 2019:1507-24.

10  
11  
12 396  
13  
14  
15  
16  
17  
18  
19  
20  
21  
22  
23  
24  
25  
26  
27  
28  
29  
30  
31  
32  
33  
34  
35  
36  
37  
38  
39  
40  
41  
42  
43  
44  
45  
46  
47  
48  
49  
50  
51  
52  
53  
54  
55  
56  
57  
58  
59  
60

For peer review only

## Supplemental file 1. Database search strategies.

### MEDLINE search strategy

#### Research question 1

1. (implementation science or implementation framework or implementation research or implementation process or implementation effectiveness or knowledge transfer or knowledge exchange or knowledge translation).af.
2. (framework\* or theor\* or model\* or checklist\* or classifi\* or categor\* or concept\* or tool or protocol).af.
3. 1 and 2
4. (health intervention or health care or healthcare or evidence-based intervention or evidence-based practice or health service\*).af.
5. 3 and 4
6. limit 5 to (english language and humans and yr="2011 -Current")
7. (equity or health equity or inequal\* or health inequal\* or disparit\* or health diparit\* or inequit\* or health inequit\*).af.
8. 6 and 7

#### Research question 2

1. (implementation science or implementation framework or implementation research or implementation process or implementation effectiveness or knowledge transfer or knowledge exchange or knowledge translation).af.
2. (health intervention or health care or healthcare or evidence-based intervention or evidence-based practice or health service\*).af.
3. 1 and 2
4. (equity or health equity or inequal\* or health inequal\* or disparit\* or health diparit\* or inequit\* or health inequit\*).af.
5. 3 and 4
6. limit 5 to (english language and humans and yr="2011 -Current")
7. barrier\* or hinder or obstacle\* or imped\*
8. 6 and 7
9. (facilitat\* or enabl\* or moderat\* or influence\* or impact or aid or assist or enhanc\*).af.
10. 6 and 9

## CINAHL search strategy

| <b>Research question 1</b> |                                                                                                                                                                                                              |
|----------------------------|--------------------------------------------------------------------------------------------------------------------------------------------------------------------------------------------------------------|
| 1.                         | implementation science or implementation framework or implementation research or implementation process or implementation effectiveness or knowledge transfer or knowledge exchange or knowledge translation |
| 2.                         | framework* or theor* or model* or checklist* or classifi* or categor* or concept* or tool or protocol                                                                                                        |
| 3.                         | S1 AND S2                                                                                                                                                                                                    |
| 4.                         | health intervention or health care or healthcare or evidence-based intervention or evidence-based practice or health service*                                                                                |
| 5.                         | S3 AND S4; Limiters - Published Date: 20110101-20220131 ; English Language; Human                                                                                                                            |
| 6.                         | equity or health equity or inequal* or health inequal* or disparit* or health diparit* or inequit* or health inequit*                                                                                        |
| 7.                         | S5 AND S6                                                                                                                                                                                                    |
| <b>Research question 2</b> |                                                                                                                                                                                                              |
| 1.                         | implementation science or implementation framework or implementation research or implementation process or implementation effectiveness or knowledge transfer or knowledge exchange or knowledge translation |
| 2.                         | health intervention or health care or healthcare or evidence-based intervention or evidence-based practice or health service*                                                                                |
| 3.                         | S1 AND S2                                                                                                                                                                                                    |
| 4.                         | equity or health equity or inequal* or health inequal* or disparit* or health diparit* or inequit* or health inequit*                                                                                        |
| 5.                         | S3 AND S4; Limiters - Published Date: 20110101-20220131 ; English Language; Human                                                                                                                            |
| 6.                         | barrier* or hinder or obstacle* or imped*                                                                                                                                                                    |
| 7.                         | S5 AND S6                                                                                                                                                                                                    |
| 8.                         | facilitat* or enabl* or moderat* or influence* or impact or aid or assist or enhanc*                                                                                                                         |
| 9.                         | S5 AND S8                                                                                                                                                                                                    |

## D&I database search strategy

| <b>Search criteria:</b> |                              |
|-------------------------|------------------------------|
| 1.                      | D And/Or I: Implementation   |
| 2.                      | Socio-Ecological levels: All |
| 3.                      | Constructs: Health Equity    |

## Preferred Reporting Items for Systematic reviews and Meta-Analyses extension for Scoping Reviews (PRISMA-ScR) Checklist

| SECTION                                               | ITEM | PRISMA-ScR CHECKLIST ITEM                                                                                                                                                                                                                                                                                  | REPORTED ON PAGE # |
|-------------------------------------------------------|------|------------------------------------------------------------------------------------------------------------------------------------------------------------------------------------------------------------------------------------------------------------------------------------------------------------|--------------------|
| <b>TITLE</b>                                          |      |                                                                                                                                                                                                                                                                                                            |                    |
| Title                                                 | 1    | Identify the report as a scoping review.                                                                                                                                                                                                                                                                   |                    |
| <b>ABSTRACT</b>                                       |      |                                                                                                                                                                                                                                                                                                            |                    |
| Structured summary                                    | 2    | Provide a structured summary that includes (as applicable): background, objectives, eligibility criteria, sources of evidence, charting methods, results, and conclusions that relate to the review questions and objectives.                                                                              |                    |
| <b>INTRODUCTION</b>                                   |      |                                                                                                                                                                                                                                                                                                            |                    |
| Rationale                                             | 3    | Describe the rationale for the review in the context of what is already known. Explain why the review questions/objectives lend themselves to a scoping review approach.                                                                                                                                   |                    |
| Objectives                                            | 4    | Provide an explicit statement of the questions and objectives being addressed with reference to their key elements (e.g., population or participants, concepts, and context) or other relevant key elements used to conceptualize the review questions and/or objectives.                                  |                    |
| <b>METHODS</b>                                        |      |                                                                                                                                                                                                                                                                                                            |                    |
| Protocol and registration                             | 5    | Indicate whether a review protocol exists; state if and where it can be accessed (e.g., a Web address); and if available, provide registration information, including the registration number.                                                                                                             |                    |
| Eligibility criteria                                  | 6    | Specify characteristics of the sources of evidence used as eligibility criteria (e.g., years considered, language, and publication status), and provide a rationale.                                                                                                                                       |                    |
| Information sources*                                  | 7    | Describe all information sources in the search (e.g., databases with dates of coverage and contact with authors to identify additional sources), as well as the date the most recent search was executed.                                                                                                  |                    |
| Search                                                | 8    | Present the full electronic search strategy for at least 1 database, including any limits used, such that it could be repeated.                                                                                                                                                                            |                    |
| Selection of sources of evidence†                     | 9    | State the process for selecting sources of evidence (i.e., screening and eligibility) included in the scoping review.                                                                                                                                                                                      |                    |
| Data charting process‡                                | 10   | Describe the methods of charting data from the included sources of evidence (e.g., calibrated forms or forms that have been tested by the team before their use, and whether data charting was done independently or in duplicate) and any processes for obtaining and confirming data from investigators. |                    |
| Data items                                            | 11   | List and define all variables for which data were sought and any assumptions and simplifications made.                                                                                                                                                                                                     |                    |
| Critical appraisal of individual sources of evidence§ | 12   | If done, provide a rationale for conducting a critical appraisal of included sources of evidence; describe the methods used and how this information was used in any data synthesis (if appropriate).                                                                                                      |                    |
| Synthesis of results                                  | 13   | Describe the methods of handling and summarizing the data that were charted.                                                                                                                                                                                                                               |                    |

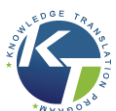



| SECTION                                       | ITEM | PRISMA-ScR CHECKLIST ITEM                                                                                                                                                                       | REPORTED ON PAGE # |
|-----------------------------------------------|------|-------------------------------------------------------------------------------------------------------------------------------------------------------------------------------------------------|--------------------|
| <b>RESULTS</b>                                |      |                                                                                                                                                                                                 |                    |
| Selection of sources of evidence              | 14   | Give numbers of sources of evidence screened, assessed for eligibility, and included in the review, with reasons for exclusions at each stage, ideally using a flow diagram.                    |                    |
| Characteristics of sources of evidence        | 15   | For each source of evidence, present characteristics for which data were charted and provide the citations.                                                                                     |                    |
| Critical appraisal within sources of evidence | 16   | If done, present data on critical appraisal of included sources of evidence (see item 12).                                                                                                      |                    |
| Results of individual sources of evidence     | 17   | For each included source of evidence, present the relevant data that were charted that relate to the review questions and objectives.                                                           |                    |
| Synthesis of results                          | 18   | Summarize and/or present the charting results as they relate to the review questions and objectives.                                                                                            |                    |
| <b>DISCUSSION</b>                             |      |                                                                                                                                                                                                 |                    |
| Summary of evidence                           | 19   | Summarize the main results (including an overview of concepts, themes, and types of evidence available), link to the review questions and objectives, and consider the relevance to key groups. |                    |
| Limitations                                   | 20   | Discuss the limitations of the scoping review process.                                                                                                                                          |                    |
| Conclusions                                   | 21   | Provide a general interpretation of the results with respect to the review questions and objectives, as well as potential implications and/or next steps.                                       |                    |
| <b>FUNDING</b>                                |      |                                                                                                                                                                                                 |                    |
| Funding                                       | 22   | Describe sources of funding for the included sources of evidence, as well as sources of funding for the scoping review. Describe the role of the funders of the scoping review.                 |                    |

JBI = Joanna Briggs Institute; PRISMA-ScR = Preferred Reporting Items for Systematic reviews and Meta-Analyses extension for Scoping Reviews.

\* Where *sources of evidence* (see second footnote) are compiled from, such as bibliographic databases, social media platforms, and Web sites.

† A more inclusive/heterogeneous term used to account for the different types of evidence or data sources (e.g., quantitative and/or qualitative research, expert opinion, and policy documents) that may be eligible in a scoping review as opposed to only studies. This is not to be confused with *information sources* (see first footnote).

‡ The frameworks by Arksey and O'Malley (6) and Levac and colleagues (7) and the JBI guidance (4, 5) refer to the process of data extraction in a scoping review as data charting.

§ The process of systematically examining research evidence to assess its validity, results, and relevance before using it to inform a decision. This term is used for items 12 and 19 instead of "risk of bias" (which is more applicable to systematic reviews of interventions) to include and acknowledge the various sources of evidence that may be used in a scoping review (e.g., quantitative and/or qualitative research, expert opinion, and policy document).

From: Tricco AC, Lillie E, Zarin W, O'Brien KK, Colquhoun H, Levac D, et al. PRISMA Extension for Scoping Reviews (PRISMA-ScR): Checklist and Explanation. *Ann Intern Med.* 2018;169:467–473. doi: [10.7326/M18-0850](https://doi.org/10.7326/M18-0850).

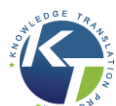

Supplement: bmjopen-2022-065721.draft_revisions.pdf [file bmjopen-2022-065721.draft_revisions.pdf]
