# Supplementary material for: Supporting implementation of interventions to address ethnicity-related health inequities: frameworks, facilitators and barriers – a scoping review protocol
Source: PubMed Central journal article supplement — BMJ Open. 2023 Feb 9;13(2):e065721. doi: 10.1136/bmjopen-2022-065721 (PMC9923318; doi:10.1136/bmjopen-2022-065721), 2023-02-09
Supplement: bmjopen-2022-065721supp001.pdf [file bmjopen-2022-065721supp001.pdf]

**Supplemental file 1. Database search strategies.****MEDLINE search strategy**

|                                                                                                                                                                                                                       |
|-----------------------------------------------------------------------------------------------------------------------------------------------------------------------------------------------------------------------|
| <b>Research question 1</b>                                                                                                                                                                                            |
| 1. (implementation science or implementation framework or implementation research or implementation process or implementation effectiveness or knowledge transfer or knowledge exchange or knowledge translation).af. |
| 2. (framework* or theor* or model* or checklist* or classifi* or categor* or concept* or tool or protocol).af.                                                                                                        |
| 3. 1 and 2                                                                                                                                                                                                            |
| 4. (health intervention or health care or healthcare or evidence-based intervention or evidence-based practice or health service*).af.                                                                                |
| 5. 3 and 4                                                                                                                                                                                                            |
| 6. limit 5 to (english language and humans and yr="2011 -Current")                                                                                                                                                    |
| 7. (equity or health equity or inequal* or health inequal* or disparit* or health diparit* or inequit* or health inequit*).af.                                                                                        |
| 8. 6 and 7                                                                                                                                                                                                            |
| <b>Research question 2</b>                                                                                                                                                                                            |
| 1. (implementation science or implementation framework or implementation research or implementation process or implementation effectiveness or knowledge transfer or knowledge exchange or knowledge translation).af. |
| 2. (health intervention or health care or healthcare or evidence-based intervention or evidence-based practice or health service*).af.                                                                                |
| 3. 1 and 2                                                                                                                                                                                                            |
| 4. (equity or health equity or inequal* or health inequal* or disparit* or health diparit* or inequit* or health inequit*).af.                                                                                        |
| 5. 3 and 4                                                                                                                                                                                                            |
| 6. limit 5 to (english language and humans and yr="2011 -Current")                                                                                                                                                    |
| 7. barrier* or hinder or obstacle* or imped*                                                                                                                                                                          |
| 8. 6 and 7                                                                                                                                                                                                            |
| 9. (facilitat* or enabl* or moderat* or influence* or impact or aid or assist or enhanc*).af.                                                                                                                         |
| 10. 6 and 9                                                                                                                                                                                                           |

**CINAHL search strategy**

| <b>Research question 1</b> |                                                                                                                                                                                                              |
|----------------------------|--------------------------------------------------------------------------------------------------------------------------------------------------------------------------------------------------------------|
| 1.                         | implementation science or implementation framework or implementation research or implementation process or implementation effectiveness or knowledge transfer or knowledge exchange or knowledge translation |
| 2.                         | framework* or theor* or model* or checklist* or classifi* or categor* or concept* or tool or protocol                                                                                                        |
| 3.                         | S1 AND S2                                                                                                                                                                                                    |
| 4.                         | health intervention or health care or healthcare or evidence-based intervention or evidence-based practice or health service*                                                                                |
| 5.                         | S3 AND S4; Limiters - Published Date: 20110101-20220131 ; English Language; Human                                                                                                                            |
| 6.                         | equity or health equity or inequal* or health inequal* or disparit* or health diparit* or inequit* or health inequit*                                                                                        |
| 7.                         | S5 AND S6                                                                                                                                                                                                    |
| <b>Research question 2</b> |                                                                                                                                                                                                              |
| 1.                         | implementation science or implementation framework or implementation research or implementation process or implementation effectiveness or knowledge transfer or knowledge exchange or knowledge translation |
| 2.                         | health intervention or health care or healthcare or evidence-based intervention or evidence-based practice or health service*                                                                                |
| 3.                         | S1 AND S2                                                                                                                                                                                                    |
| 4.                         | equity or health equity or inequal* or health inequal* or disparit* or health diparit* or inequit* or health inequit*                                                                                        |
| 5.                         | S3 AND S4; Limiters - Published Date: 20110101-20220131 ; English Language; Human                                                                                                                            |
| 6.                         | barrier* or hinder or obstacle* or impeded*                                                                                                                                                                  |
| 7.                         | S5 AND S6                                                                                                                                                                                                    |
| 8.                         | facilitat* or enabl* or moderat* or influence* or impact or aid or assist or enhanc*                                                                                                                         |
| 9.                         | S5 AND S8                                                                                                                                                                                                    |

**D&I database search strategy**

| <b>Search criteria:</b> |                              |
|-------------------------|------------------------------|
| 1.                      | D And/Or I: Implementation   |
| 2.                      | Socio-Ecological levels: All |
| 3.                      | Constructs: Health Equity    |
